# Supplementary material for: Improved In Vivo Anti-Tumor and Anti-Metastatic Effect of GnRH-III-Daunorubicin Analogs on Colorectal and Breast Carcinoma Bearing Mice
Source: MDPI journal article supplement (doi:10.3390/ijms20194763), 2019-09-25
Supplement: s1 [file s1]

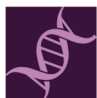

*Supplementary Part*

# Improved In Vivo Anti-Tumor and Anti-Metastatic Effect of GnRH-III-Daunorubicin Analogs on Colorectal and Breast Carcinoma Bearing Mice.

Ivan Randelović <sup>1</sup>, Sabine Schuster <sup>2,3</sup>, Bence Kapuvári <sup>4</sup>, Gianluca Fossati <sup>5</sup>, Christian Steinkühler <sup>5</sup>, Gábor Mező <sup>2,3</sup> and József Tóvári <sup>1,\*</sup>

<sup>1</sup> Department of Experimental Pharmacology, National Institute of Oncology, 1122 Budapest, Hungary; ivan.randel@gmail.com (I.R.)

<sup>2</sup> Faculty of Science, Institute of Chemistry, Eötvös Loránd University, 1117 Budapest Hungary, sabine.schuster83@gmail.com (S.S.); gmezo@caesar.elte.hu (G.M.)

<sup>3</sup> MTA-ELTE Research Group of Peptide Chemistry, Hungarian Academy of Sciences, Eötvös Loránd University, 1117 Budapest, Hungary; sabine.schuster83@gmail.com (S.S.); gmezo@caesar.elte.hu (G.M.)

<sup>4</sup> Department of Biochemistry, National Institute of Oncology, 1122 Budapest, Hungary; zeuglodon@freemail.hu (B.K.)

<sup>5</sup> Preclinical R&D, Italfarmaco SpA, 20092 Cinisello Balsamo (Milan), Italy; g.fossati@italfarmaco.com (G.F.); c.steinkuhler@italfarmaco.com (C.S.)

\* Correspondence: jtovari@yahoo.com (J.T.); Tel.: +36-1-224-8778

Received: date; Accepted: date; Published: 27 September 2019

## Table of Content

|                                                                                                                                        |   |
|----------------------------------------------------------------------------------------------------------------------------------------|---|
| Stability of GnRH-III-Dau conjugates in mice plasma.....                                                                               | 2 |
| GnRH-R mRNA, absolute protein and cell surface expression level compared to MRC-5 and cellular uptake rates of conjugates 1 and 2..... | 3 |
| Spleen weight in 4T1 tumor bearing mice.....                                                                                           | 4 |

*Stability of GnRH-III-Dau conjugates in mice plasma*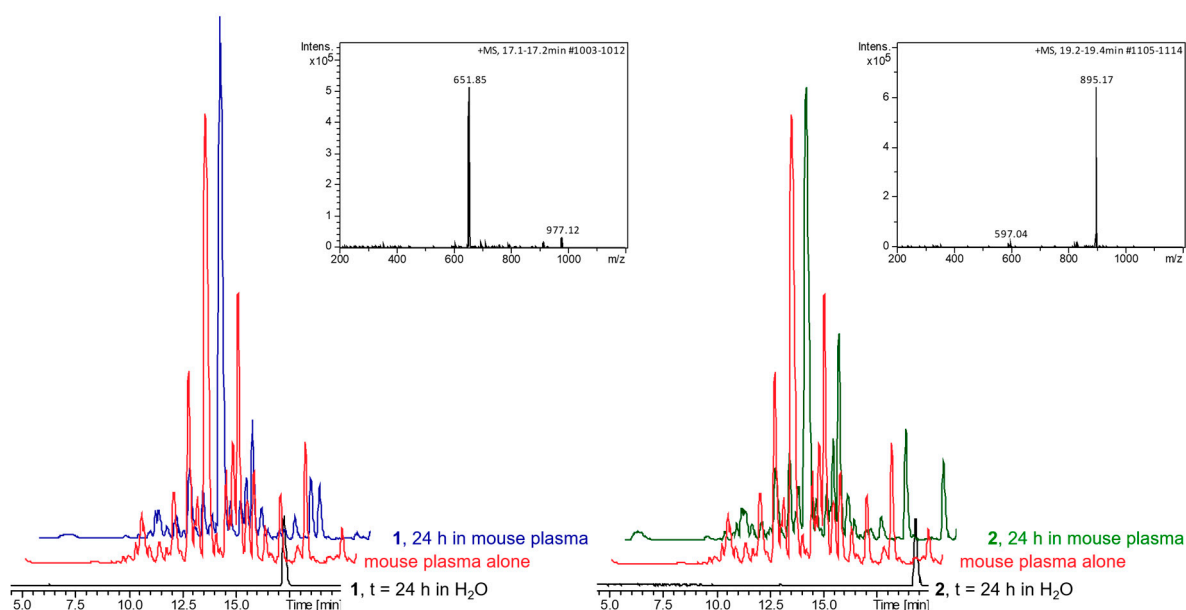

**Figure S1.** Stability of the GnRH-III-Dau conjugates 1 and 2 in mouse plasma. LC-MS chromatogram of mouse plasma and the conjugates after 24 hours incubation at 37 °C in ddH<sub>2</sub>O or in human plasma plus the corresponding MS compound spectra.

*GnRH-R mRNA, absolute protein and cell surface expression level compared to MRC-5 and cellular uptake rates of conjugates 1 and 2*

**Table S1.** GnRH-R mRNA, absolute protein and cell surface expression level compared to MRC-5. Cellular uptake of conjugates 1 and 2 (40  $\mu$ M), after 6 h treatment of the cell lines. Values from 2 independent experiments are shown.

|                    | MRC-5 | MDA-MB-231 | HT-29 | A2780  | PANC-1 | U87MG | 4T1    |
|--------------------|-------|------------|-------|--------|--------|-------|--------|
| mRNA               | 1.0   | 5.1        | 3.3   | 1.6    | 1.4    | 0.5   | n.d.   |
|                    | 1.0   | 9.5        | 5.9   | 5.3    | 2.2    | 1.1   | n.d.   |
| Protein            | 1.0   | 1.5        | 2.7   | 5.8    | 0.9    | 4.5   | 4.3    |
|                    | 1.0   | 1.0        | 0.6   | 2.0    | 0.5    | 2.6   | 2.5    |
| Cell surface       | 1.0   | 6.3        | 2.2   | 6.5    | 4.7    | 3.1   | 4.2    |
|                    | 1.0   | 5.0        | 1.8   | 4.7    | 3.4    | 4.3   | 3.4    |
| Uptake Conjugate 1 | 8.1   | 12.0       | 12.4  | 12.2   | 5.8    | 12.9  | 13.0   |
|                    | 8.3   | 18.2       | 22.4  | 22.3   | 6.4    | 14.8  | 21.1   |
| Uptake Conjugate 2 | 14.9  | 19.9       | 21.0  | 26.3   | 15.4   | 22.3  | 26.8   |
|                    | 15.3  | 34.0*      | 38.3* | 42.8** | 17.9*  | 26.8* | 38.8** |

n.d. = not determined. <sup>1</sup> Relative GnRH-R mRNA expression normalized to  $\beta$ -actin and GAPDH. <sup>2</sup> Relative GnRH-R protein expression normalized to  $\beta$ -actin. <sup>3</sup> Relative GnRH-R Geo MFI. <sup>4</sup> Relative Geo MFI normalized to auto fluorescence. Statistical analysis for uptake studies of conjugates 1 and 2 was performed by 2way ANOVA test. \* and \*\* mean significant at  $p < 0.05$  and  $p < 0.01$ , respectively.

*Spleen weight in 4T1 tumor bearing mice*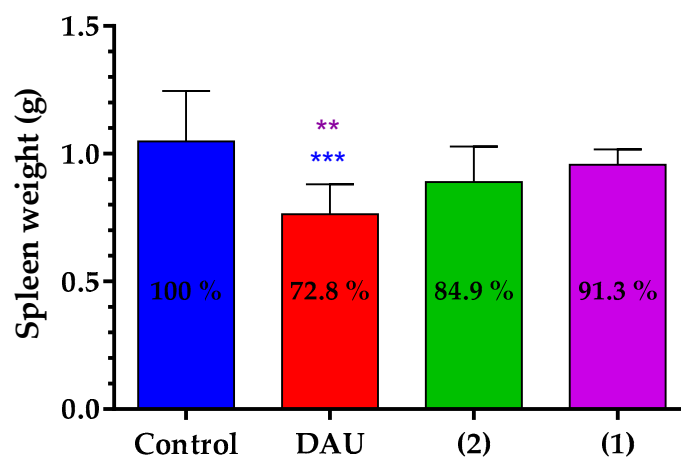

**Figure S2.** Spleen weight in 4T1 tumor bearing mice (grams, average  $\pm$  SD) after termination of experiment, 28 days subsequent to cells inoculation, 7 animals per group, statistical analysis was performed by Mann-Whitney test. \*\* and \*\*\* mean significant at  $p < 0.01$ , and  $p < 0.001$ , respectively. \* blue and purple mean significant difference compared to control and 1 groups respectively.

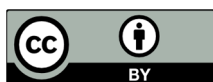

© 2019 by the authors. Licensee MDPI, Basel, Switzerland. This article is an open access article distributed under the terms and conditions of the Creative Commons Attribution (CC BY) license (<http://creativecommons.org/licenses/by/4.0/>).
